# Supplementary material for: Biomarkers to Predict Lethal Radiation Injury to the Rat Lung
Source: MDPI journal article supplement (doi:10.3390/ijms24065627), 2023-03-15
Supplement: s1 [file s1]

# Supplemental Figure S1

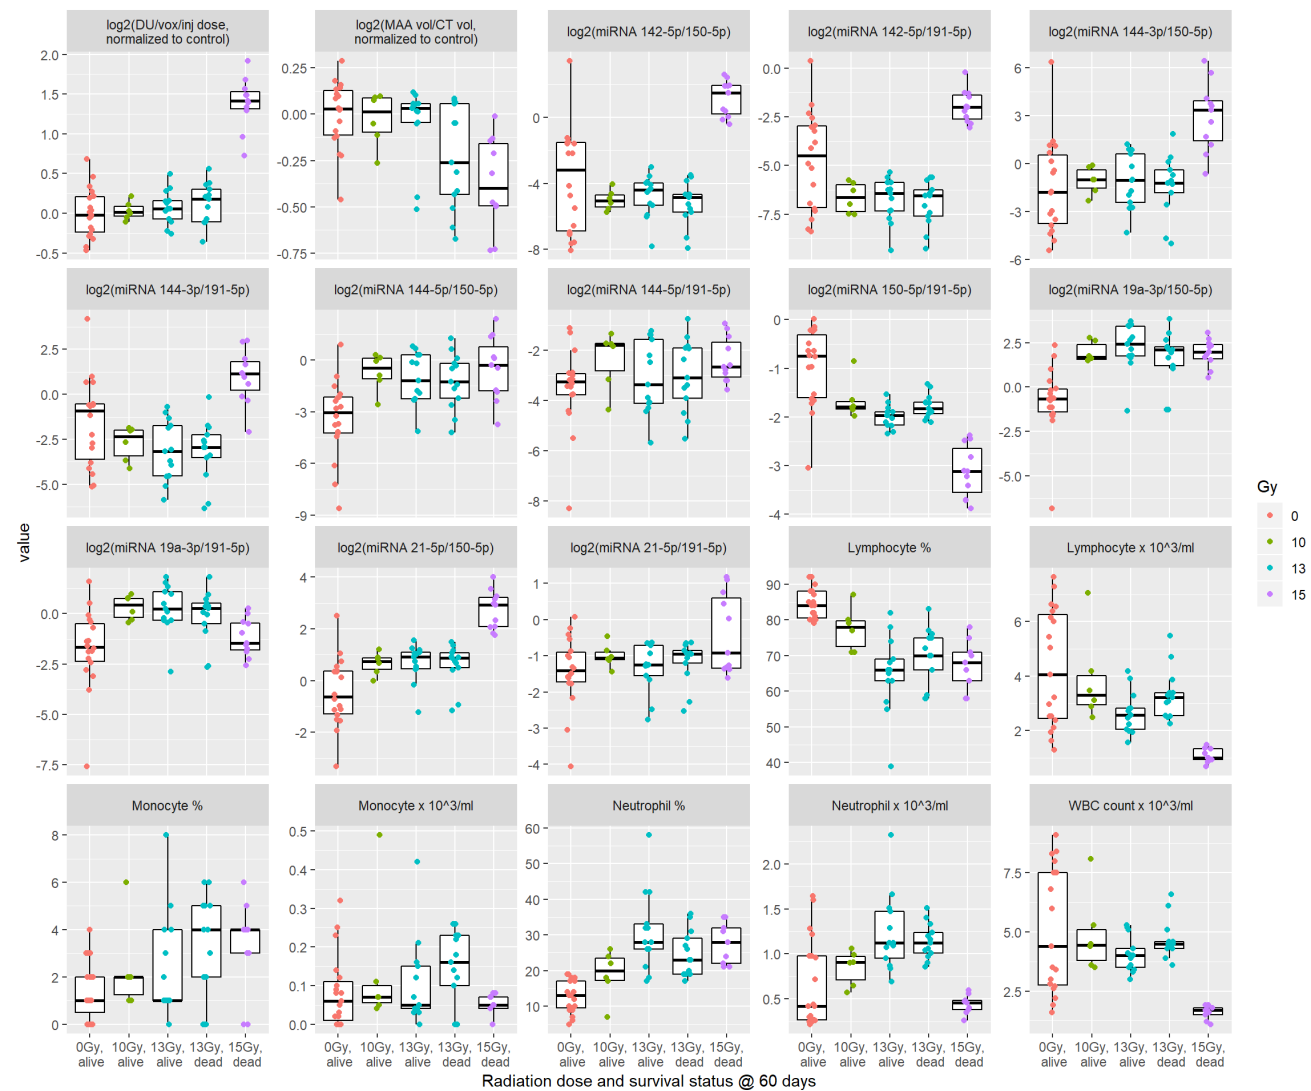

Supplemental Figure S1. Complete data set plotted by outcome.

# Supplemental Figure S2

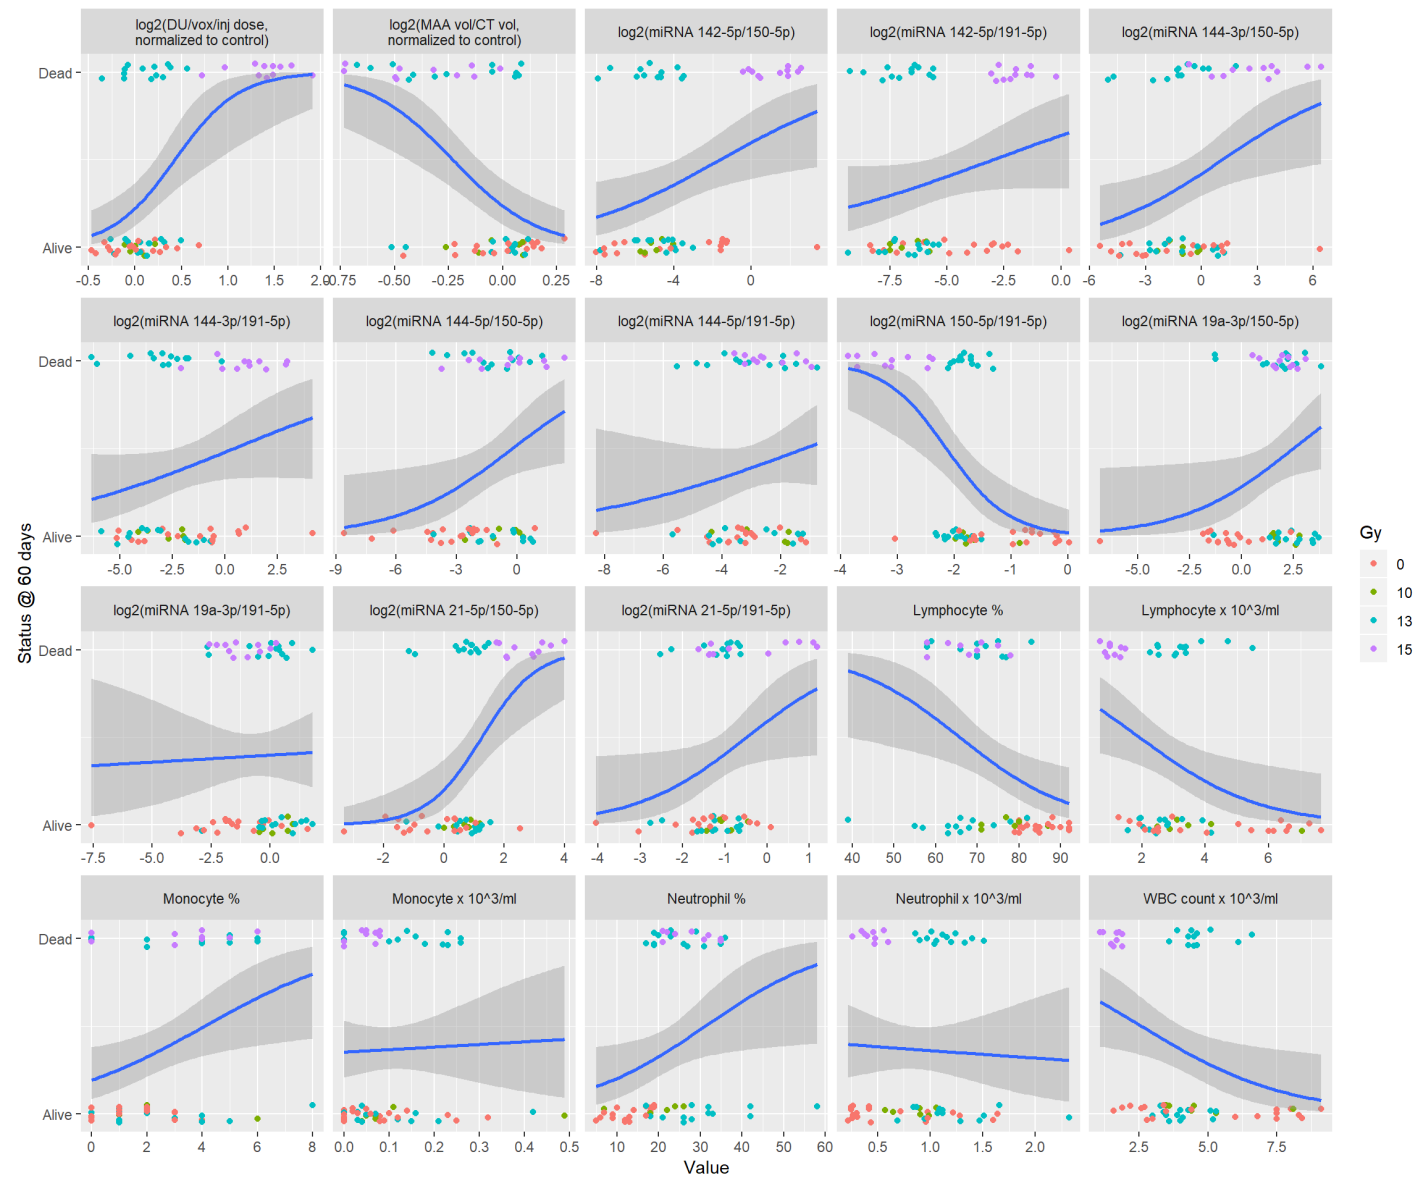

**Supplemental Figure S2.** Visualization of the complete data set by univariate strip plots of predictors of 60-day survival with overlaid logistic regression curves.
